1 **Inter- and intra-specific genomic divergence in *Drosophila montana* shows evidence for**  
2 **cold adaptation**

3

4 D. J. Parker<sup>1,2,3</sup>, R. A. W. Wiberg<sup>2</sup>, U. Trivedi<sup>4</sup>, V. I. Tyukmaeva<sup>1</sup>, K. Gharbi<sup>4</sup>, R. K. Butlin<sup>5</sup>, A.  
5 Hoikkala<sup>1</sup>, M. Kankare<sup>1\*</sup>, and M. G. Ritchie<sup>2\*</sup>

6

7 1. Department of Biological and Environmental Science, University of Jyväskylä, P.O.

8 Box 35, FI-40014, Jyväskylä, Finland

9 2. Centre for Biological Diversity, School of Biology, University of St Andrews, Fife, KY16

10 9TH, UK.

11 3. Department of Ecology and Evolution, University of Lausanne, Biophore, Lausanne

12 1015, Switzerland

13 4. Edinburgh Genomics, School of Biological Sciences, University of Edinburgh,

14 Edinburgh, UK

15 5. Department of Animal and Plant Sciences, The University of Sheffield, Sheffield, U.K;

16 and Department of Marine Sciences, University of Gothenburg, 405 30 Göteborg,

17 Sweden

18 \*Corresponding authors: Maaria Kankare: [s.maaria.kankare@jyu.fi](mailto:s.maaria.kankare@jyu.fi), Michael Ritchie:

19 [mgr@st-andrews.ac.uk](mailto:mgr@st-andrews.ac.uk)

20

21

22

23 **Abstract**

24 The genomes of species that are ecological specialists will likely contain signatures of  
25 genomic adaptation to their niche. However, distinguishing genes related to their ecological  
26 specialism from other sources of selection and more random changes is a challenge. Here  
27 we describe the genome of *Drosophila montana*, the most extremely cold-adapted  
28 *Drosophila* species. We describe the genome, which is similar in size and gene content to  
29 most *Drosophila* species. We look for evidence of accelerated divergence from a previously  
30 sequenced relative, and do not find strong evidence for divergent selection on coding  
31 sequence variation. We use branch tests to identify genes showing accelerated divergence in  
32 contrasts between cold- and warm adapted species and identify about 250 genes that show  
33 differences, possibly driven by a lower synonymous substitution rate in cold-adapted  
34 species. Divergent genes are involved in a variety of functions, including cuticular and  
35 olfactory processes. We also re-sequenced three populations of *D. montana* representing its  
36 ecological and geographic range. Outlier loci were more likely to be found on the X  
37 chromosome and there was a greater than expected overlap between population outliers  
38 and those genes implicated in cold adaptation between *Drosophila* species, implying some  
39 continuity of selective process at these different evolutionary scales.

40

## 41 INTRODUCTION

42

43 Comparative genomic analyses provide new insights into our understanding of evolutionary  
44 processes by helping to identify genes contributing to adaptive divergence. If strong  
45 divergent selection due to environmental adaptation or social interactions, such as sexual  
46 selection, act as “barrier loci” by influencing species isolation, then identifying them can help  
47 to understand the process of speciation [1,2]. However, accurately identifying such genes is  
48 a considerable challenge [3–6].

49

50 Genomic analysis has often been hampered by poor understanding of the sources of  
51 selection contributing to species divergence. However, the increasing availability of  
52 genomes from species with distinct ecological specialisations has allowed improved  
53 identification of genes and genomic features involved in adaptations to specific ecologies.  
54 Examples of this are the cactophilic *Drosophila* [7,8], Asian longhorn beetles with specialized  
55 feeding habits [9], climate-mediated adaptations in honey bees [10] and adaptation to high  
56 altitude in humans [11]. Here we describe the genome of *Drosophila montana*, a widely-  
57 distributed northern member of the virilis group of *Drosophila*, which shows unique  
58 adaptations to seasonally varying environmental conditions prevailing at high latitudes and  
59 altitudes. *D. montana* is the most cold-tolerant *Drosophila* species known [12,13], and this  
60 cold tolerance, as well as a robust photoperiodic diapause [14] and inducible cold  
61 acclimation [15], contribute to its ability to survive through cold and dark winters. The daily  
62 and seasonal activity patterns of *D. montana*, and the interactions and neurochemistry of  
63 the core circadian clock genes behind these patterns, differs from those of more temperate  
64 species such as *D. melanogaster* [16,17]. These features have likely played an important role  
65 in allowing *D. montana* to colonize and persist in high-latitude environments [17–19].

66 *D. montana* belongs to the virilis group of *Drosophila*, which comprises 13 species or  
67 subspecies divided into two clades, the virilis and montana phylads, the latter being further  
68 split into three lineages [20]. These phylads are thought to have diverged in South Asia  
69 during the Early Miocene, after which both of them entered the New World by way of  
70 Beringia [21]. The virilis phylad is constrained mostly within the temperate zone, while the  
71 montana phylad has expanded into a variety of habitats and spread to higher latitudes [21].  
72 Divergence of the two phylads has been estimated to have occurred 7 [22] to 11 [20] million  
73 years ago, while the North American, European and Asian *D. montana* populations have  
74 diverged within the last 450,000 to 900,000 years [23]. Interestingly, conspecific *D. montana*  
75 populations have been shown to diverge in traits that play a role in ecological adaptation  
76 (e.g. Lankinen et al. [24] and Tyukmaeva et al. [25]), male sexual cues and female  
77 preferences (e.g. Klappert et al. [26]), and also to show sexual and post-mating pre-zygotic  
78 reproductive barriers [27]. Information on potential candidate genomic regions and genes  
79 for traits involved in adaptation and sexual selection has been accumulated through QTL  
80 analyses [25,28], microarray [29,30] and transcriptome [31–33] studies.

81

82 Here we compare the genome of *D. montana* to that of a more temperate species of the  
83 same group, *D. virilis*, to identify genes showing evidence of divergent selection. We also  
84 compare the divergence of these species at candidate gene sets suspected to evolve rapidly,

85 including genes known to be involved in cold tolerance. We then extend these analyses to  
86 multiple species and identify genes showing elevated nonsynonymous substitution counts  
87 across cold-tolerant species of *Drosophila* to recover broader patterns in the evolution of  
88 insect cold-tolerance genes. In order to examine the continuity of divergence at the  
89 intraspecific level, we also use pooled genomic sequencing to detect outliers between three  
90 *D. montana* populations known to be divergent in ecology and behaviour [25,34] and to  
91 show evidence of sexual isolation and gametic incompatibilities [27]. We compare  
92 divergence seen at these different evolutionary levels. Our results thus give a novel insight  
93 into genomic patterns of selection-driven divergence at different evolutionary scales, in  
94 addition to providing a well-annotated genome for a uniquely cold adapted insect species.

95

96

97

98 **MATERIALS AND METHODS**

99

100 **Samples and Sequencing**

101

102 Genomic DNA for the *D. montana* reference genome was extracted from an inbred  
103 isofemale line originating from Vancouver, Canada (Can3F9) in summer 2003. This line was  
104 inbred via full-sib matings for 37 generations, relaxed for 9 generations and maintained on  
105 malt food [35] at 19°C in constant light. Quality checked DNA extracted from 210 males  
106 using a Gentra Puregene Tissue Kit (Qiagen) was used to produce 3 libraries with different  
107 insert sizes: 200bp, 400bp and 3,000bp. The 200bp and 400bp libraries were sequenced  
108 using an Illumina HiSeq 2000 at Edinburgh Genomics to produce paired-end reads (101 +  
109 101bp). The 3,000bp library was sequenced using an Illumina MiSeq at The Centre for  
110 Genomic Research, University of Liverpool to produce mate-pair reads (101+101bp). This  
111 strategy produced 65107854 paired-end reads for the 200bp library, 25618163 paired end  
112 reads for the 400bp library and 19020110 mate-pair reads for the 3000bp library. Reads  
113 from the 200bp and 400bp libraries were trimmed using scythe [36] to remove adaptors and  
114 sickle [37] to quality trim reads (bases with phred quality of <20 were trimmed from the tail  
115 end of each read). Reads from the 3,000bp library were trimmed in the same manner, with  
116 the addition of a linker sequence removal step.

117

118 An initial assembly using reads from the 200bp and 400bp libraries was made using CLC  
119 assembly cell (4.0.12). Contigs from this were then blasted (blastN) to two subsets of NCBI's  
120 nt database (arthropod and bacteria) with a e-value threshold of  $1 \times 10^{-40}$ . Bit scores of blast  
121 hits from the arthropod and bacterial databases were compared for each contig, and any  
122 with a higher bit score for bacteria than arthropods were considered to be contaminants  
123 (**Supplementary Figure 1**). Reads were mapped to contigs identified as contaminants using  
124 BWA (v. 0.7.12) [38] and then the unmapped reads were assembled using CLC assembly cell  
125 (4.0.12) (default options, minimum contig length = 200bp). Contigs were then scaffolded  
126 using the 3,000bp mate pair library using SSPACE-BASIC-2.0. This assembly contained 68950  
127 scaffolds (N50 = 39341). This assembly was then further screened for contaminants using  
128 DeconSeq (v. 0.4.3) [39]. Bacterial (2786) and viral (4359) genomes were downloaded from  
129 NCBI on January 20<sup>th</sup> 2016 and used as the contamination databases in DeconSeq along with  
130 the human genome (hg38). The *D. melanogaster* (r6.09) and *D. virilis* (r1.05) genomes were  
131 used as retention databases. DeconSeq identified 5208 scaffolds as contaminants, which  
132 were removed from our assembly. We then used this assembly for all subsequent analyses.  
133 To assess the completeness of our genome assembly we used the CEGMA analysis pipeline  
134 (v. 2.4) [40,41] which identifies the presence of 248 conserved eukaryote genes, and the  
135 BUSCO pipeline (v.1.22) [42] which identifies the presence of 2675 conserved arthropod  
136 genes.

137

138

## 139 **Genome Annotation**

140

141 Full details of the genome annotation are given in the supplementary methods. Briefly, we  
142 used the Maker2 pipeline [43] to first mask putative repeats within the genome, and then  
143 used *ab initio* gene predictors SNAP and AUGUSTUS, and gene evidence (from proteins  
144 homology and RNA-seq data) to generate gene predictions. Gene predictions from Maker2  
145 were reciprocally blasted to proteins from *D. virilis* (r1.2) with the following cutoffs: e-value  
146  $< 3 \times 10^{-13}$ , query cover  $> 60\%$  to give reciprocal best blast hits (RBBH). Orthologs for *D.*  
147 *melanogaster*, *D. sechellia*, *D. simulans*, *D. erecta*, *D. yakuba*, *D. ananassae*, *D. persimilis*, *D.*  
148 *pseudoobscura*, *D. willistoni*, *D. mojavensis*, and *D. grimshawi* were then obtained from  
149 FlyBase using *D. virilis* FlyBase numbers. Genes without a single ortholog for each species  
150 were discarded from multi-species selection analyses (below).

151

## 152 **Linkage map construction**

153

154 For the genetic map construction, we selected 192 samples from a previous QTL study [25],  
155 which consisted of two families (four parent individuals and their F2 progeny, females only).  
156 We used RAPiD Genomics facilities to develop a set of oligonucleotide probes for 13,975  
157 selected regions in the largest scaffolds of the *Drosophila montana* genome. These probes  
158 were used to capture sequence these target loci with 100bp single end reads using HiSeq  
159 2000. A resulting SNP dataset was cleaned with Genotype Checker to eliminate possible  
160 errors in pedigree/genotyping [44]. The R/qtI package [45] was used to construct a genetic  
161 linkage map after discarding any polymorphic loci that were heterozygous for both parents,  
162 duplicated markers, markers showing segregation distortion, and individuals with fewer than  
163 2000 markers. Reads from the 200bp and 400bp genome reference libraries were mapped  
164 back to anchored scaffolds using BWA (v. 0.7.12) [38]. Multi-mapping reads were discarded.  
165 Since the genome reference libraries were produced from males, X linked regions should  
166 have half the coverage of autosomal regions, we used the coverage of these scaffolds to  
167 validate our linkage map.

168

## 169 **Selection Analyses**

170

### 171 **Pairwise analysis**

172

173 To identify protein-coding genes with elevated signatures of selection we estimated pairwise  
174  $\omega$  (dN/dS) for each gene that had a reciprocal best blast hit (RBBH) to a *D. virilis* gene. The  
175 longest coding sequence of each gene and its RBBH ortholog were codon-aligned using  
176 PRANK (v.140110) [46], before estimating  $\omega$  using codeml in PAML (v. 4.8) [47,48]. To  
177 determine if any genes showed  $\omega > 1$ , we compared genes using a Bayesian estimation of  $\omega$   
178 in codeml (runmode = -3, model = 0, NSsites = 0) [49] with default priors. The p-values were  
179 corrected for multiple testing using a strict Bonferroni correction. We further filtered to  
180 exclude any genes where estimates of dN, dS or  $\omega$  were greater than 10.

181

182 We then compared mean  $\omega$  values in several candidate gene sets (genes involved in immune  
183 function, reproduction, and cold tolerance) against the genomic background. Genes were

184 classified into two ‘immune’ classes firstly using the GO term ‘immune response’ from  
185 FlyBase (version 6.05) and secondly using orthologs of genes identified as being involved in  
186 immune function by Sackton et al. [50]. Next, genes connected to reproduction were  
187 classified into several reproductive classes following Haerty et al. [51]: sex and reproduction  
188 related genes (SRR), female reproductive tract (FRTP) and seminal fluid proteins (SFP).  
189 Finally, cold tolerance genes were classified into two classes with genes differentially  
190 expressed in response to cold in *D. montana* and in *D. virilis* [31]. Parker et al. (2015) found  
191 that from the differentially expressed genes, 42 were the same in both species but 550 were  
192 different, allowing genes to be classified into ‘cold tolerance same’ and ‘cold tolerance  
193 different’ groups.

194

### 195 **Multispecies analysis**

196

197 13 species with fully annotated genome sequences available were divided into cold-tolerant  
198 and non-cold-tolerant ones; six species with a knockdown temperature <3°C [12] were  
199 classified as cold-tolerant, the remainder as non-cold-tolerant **Fig. 1**). To identify genes  
200 showing elevated signatures of selection in these species we extracted the longest CDS (N =  
201 5,619) for each ortholog and codon-aligned them using PRANK (v.140110) [46]. Sequences  
202 were then analysed in codeml from the PAML (v4.8) package [47,48]. Two models were  
203 compared; the “null” model (clock = 0; fix\_omega = 0, model = 0, NSSites = 0) which assumes  
204 a single common value for  $\omega$  with an alternative model (clock = 0; fix\_omega = 0, model = 2,  
205 NSSites = 0) which assumes one value of omega for all the cold-tolerant species and a  
206 separate value of omega for the non-cold-tolerant species. Nested models were compared  
207 using a likelihood ratio test and p-values corrected for multiple testing using a Bonferroni  
208 correction. Additionally, results were filtered to exclude sequences with dN, dS or  $\omega > 10$ .  
209 This comparison tests whether there is a different rate of molecular evolution in cold-  
210 tolerant species compared to non-cold-tolerant species.

211

### 212 **Population resequencing**

213

214 For population comparisons we used *D. montana* flies from 3 populations: Oulanka (Finland;  
215 66°N), Crested Butte, Colorado (USA; 39°N) and Vancouver (Canada; 49°N). These  
216 populations were established from the progenies of fertilized females collected in the  
217 summer of 2008 in Oulanka and Vancouver, and in the summer of 2009 in Colorado.  
218 Population cages were set up using 20 F3 generation individuals from approximately 20  
219 isofemale lines for each population. Population cages were maintained at 19°C in constant  
220 light (for more details see Jennings et al. [52]). In March 2013 Genomic DNA was extracted  
221 from a pool of 50 females for each population and sequenced at Beijing Genomics Institute  
222 using an Illumina HiSeq 2000 to produce paired-end reads (90 + 90bp, insert size = 500bp).

223

224 Sequencing produced 84938118 paired-end reads for Colorado and 82663801 for Oulanka.  
225 Two runs for Vancouver resulted in 303365095 reads. Reads were quality trimmed (leading  
226 or trailing bases with a phred score of <20, or if two consecutive bases had an average phred  
227 score of <32 the read was trimmed at this point) and screened for adaptor sequence using  
228 trimmomatic (v. 0.30) [53]. Reads containing adaptor sequence or that had a length of less

229 than 85 bp after quality trimming, were discarded. Since coverage depth can influence the  
230 estimation of allele frequency [54], reads for Vancouver were randomly sampled prior to  
231 mapping to the mean number of reads from Colorado and Oulanka. Reads were mapped to  
232 the genome assembly using BWA (v. 0.7.12) [38]. Reads with a mapping quality of <20 were  
233 then removed, and an mpileup file was produced using samtools (v. 0.1.19) [55]. From this, a  
234 sync file was produced using PoPoolation2 pipeline (v 1.201) [56]. Outlier detection was  
235 performed on the raw read count data with BayeScan v. 2.1 [57–59], which performs  
236 comparably alongside other outlier methods in several simulation studies [60–62]. SNPs  
237 were filtered to include only sites with a minimum coverage of 25 and a maximum coverage  
238 of 93 (corresponding to the median 10th and 90th percentiles of the population coverage  
239 distributions). At the same time, SNPs were only considered if the minor allele had a read  
240 count > 4 across all populations. BayeScan was run with 5 pilot runs of 1,000 iterations each  
241 followed by a main run of 2,000 iterations, a thinning interval of 10 and a burn in of 1,500.  
242 Additionally, three pairwise runs of BayeScan were performed with the same parameters as  
243 above. The three pairwise analyses compared Colorado to Vancouver, Vancouver to  
244 Oulanka, and Colorado to Oulanka populations, respectively.

245

#### 246 **Functional Enrichment**

247

248 To examine functional enrichment of genes for the species level selection analyses and  
249 population level  $F_{ST}$  scans, we used GOrilla [63]. For the pairwise selection analyses genes  
250 were ranked by  $\omega$  (from high to low and low to high). For the multispecies selection  
251 analyses, we ranked genes by p-value and direction so that genes with the lowest p-values  
252 and a higher  $\omega$  in cold-tolerant species were at the top, and genes with lowest p-values and  
253 have higher  $\omega$  in non-cold-tolerant species were at the bottom, allowing us to identify  
254 enriched GO terms for genes showing elevated  $\omega$  in cold-tolerant species. To examine GO  
255 terms for genes showing elevated  $\omega$  in non-cold-tolerant species the list order was simply  
256 reversed. For population level analyses genes were ranked by the most significantly  
257 differentiated SNP occurring within 1kb, 10kb, or 100kb of a gene for each population.  
258 Results from GOrilla were then visualised using ReviGO [64], using the January 2017 version  
259 of Gene Ontology.

260

261 We used DAVID (v6.8) [65,66] to identify enriched functional groups of genes. A functional  
262 group was considered to be significantly enriched if its enrichment score (the geometric  
263 mean (in -log scale) of the p-values of the GO terms in the group) was >1 ( $p < 0.1$ ). For the  
264 pairwise selection analyses we identified functional clusters for genes occurring in the top  
265 and bottom 10% of genes for  $\omega$  estimates. For the multispecies selection analyses we  
266 identified functional clusters for genes that showed a significantly (FDR < 0.1) higher omega  
267 in cold-tolerant species or in non-cold-tolerant species separately. For population level  
268 analyses we identified functional clusters for genes containing (within 1kb) significantly  
269 differentiated SNPs for each population.

270

271 To take advantage of the superior annotation of *D. melanogaster* [67], we used *D.*  
272 *melanogaster* orthologs for all of the above function enrichment analyses. For the DAVID



273 analyses the 'background' list used was the subset of *D. melanogaster* genes available for  
274 each analysis.  
275  
276

## 277 RESULTS

278

### 279 Genome Sequencing and Assembly

280

281 The assembled *D. montana* genome (**Table 1**) has a total length of 183.6 Mb, which falls  
282 within the range seen for *Drosophila* species (111-187 Mb), and is similar to that of *D. virilis*  
283 (172 Mb), a close relative of *D. montana* with a sequenced genome. CEGMA identified 238  
284 complete orthologs (96%) and 244 partial orthologs (98%) of the 248 CEGMA proteins and  
285 BUSCO identified 2457 genes as complete (92%), and failed to identify only 46 (1.7%).  
286 RepeatMasker identified that 14.4% of the assembly was composed of repeat elements, the  
287 major classes of which were: Simple repeats (4.5%), LTR elements (4.3%), Unclassified  
288 (2.9%), and LINEs (1.9%) (**Supplementary Figure 2**). The total percentage of repeat elements  
289 identified was around half of that found for related *Drosophila* species (*D. virilis* = 25.9%, *D.*  
290 *mojavensis* = 23.8%, and *D. grimshawi* = 26.1%) likely reflecting the problem of assembling  
291 repetitive regions with short reads.

292

293 For the genetic map construction, the final dataset contained 5,858 polymorphic SNPs. The  
294 median depth of the SNPs in the final dataset was 52.4 and the average missing data rate  
295 was 0.003. The initial analysis formed five major linkage groups (as expected since *D.*  
296 *montana* has five chromosomes in total). Chromosome number was assigned by blasting  
297 genes assigned to the linkage groups to the *D. virilis* genome, which have been localised to  
298 chromosomes and is largely syntenic with *D. montana* [28]. While the analysis showed clear  
299 linkage groups, the order of markers was not totally resolved, likely due to lack of  
300 recombination events among F2 progeny (**Supplementary Figure 3**). The tentative scaffold  
301 order and position are given in **Supplementary Table 1**. Using this map we were able to  
302 anchor approximately one third of the genome assembly to chromosomes. To validate our  
303 linkage map we examined coverage of anchored scaffolds. X-linked regions were found to  
304 have approximately half the coverage of autosomal regions, as expected since the reference  
305 genome was produced from male-only samples (**Supplementary Figure 4**).

306

### 307 Selection analyses

308

309 We obtained 13,683 predicted gene models with a mean coding region length of 1,461 bp.  
310 RBBH identified 10898 orthologs with *D. virilis*. Using the FlyBase gene numbers for *D. virilis*  
311 for these we then obtained a set of 5619 one-to-one orthologs between *D. montana*, *D.*  
312 *virilis*, *D. melanogaster*, *D. sechellia*, *D. simulans*, *D. erecta*, *D. yakuba*, *D. ananassae*, *D.*  
313 *persimilis*, *D. pseudoobscura*, *D. willistoni*, *D. mojavensis*, and *D. grimshawi*.

314

315 We estimated  $\omega$  (dN/dS) for each of the one-to-one orthologs between *D. montana* and *D.*  
316 *virilis* (**Supplemental Table 20**). No genes had a  $\omega$  significantly greater than 1 after filtering  
317 and multiple-test correction. Comparison of mean  $\omega$  for several candidate gene sets (genes  
318 involved in cold tolerance, immune function, and reproduction) found that none of the  
319 candidate genes sets differed significantly from the genomic background (**Fig. 2**). By ranking  
320 genes by  $\omega$  we identified GO terms enriched in genes with relatively high and low  $\omega$ . For  
321 those with high  $\omega$  we identified 23 enriched GO terms (Biological Processes: Molecular

322 Functions: Cellular Components = 10:4:9) (FDR < 0.1) (**Supplementary Table 2**). Semantic  
323 clustering of these GO terms shows that they fall into the following categories:  
324 Reproduction, detection of chemical binding / olfaction, amino sugar metabolism, and chitin  
325 binding (**Fig. 3**). DAVID identified 9 functional group clusters (**Supplementary Table 3**)  
326 including 2 related to chitin production and 2 related to olfactory functions, congruent with  
327 the findings from the single GO term enrichment analysis (above). In addition DAVID also  
328 identified 2 clusters involved in: immune defence (C-type lectin domain carrying genes, and  
329 Fibrinogen related genes), Transcription factor binding, and a cluster containing genes with  
330 either a CAP (cysteine-rich secretory protein) or SCP (Sperm-coating protein) domain. We  
331 identified 662 enriched GO terms for genes with low  $\omega$  between *D. montana* and *D. virilis*  
332 (Biological Processes: Molecular Functions: Cellular Components = 485:80:97) (FDR < 0.1). As  
333 expected for genes with very low  $\omega$  the enriched GO terms are consistent with  
334 housekeeping roles in the cell (cell cycle control, cell communication, cell developmental  
335 process etc.), which are expected to be under strong purifying selection (**Supplementary**  
336 **Table 4, Supplementary Figures 5-7**).

337  
338 Across the 13 *Drosophila* species we found 250 genes that had significantly different rates of  
339 evolution ( $\omega$ ) in cold- and non-cold-tolerant species (**Fig. 1, Supplemental Table 20**). dS was  
340 on average lower for cold-tolerant species than for non-cold-tolerant species while dN was  
341 very similar (**Fig. 4, Supplementary Table 5**).  $\omega$  was on average greater for cold-tolerant  
342 species, probably driven by generally lower values of dS in these species (**Supplementary**  
343 **Table 5**). 203 and 47 genes showed higher values of  $\omega$  for cold-tolerant and for non-cold-  
344 tolerant species, respectively (**Figure 5**). Genes with elevated  $\omega$  in cold-tolerant species were  
345 enriched for 23 GO terms (Biological Processes: Molecular Functions: Cellular Components =  
346 6:10:7) (FDR < 0.1) (**Supplementary Table 6**), which semantically cluster into the following  
347 categories: response to drug, male courtship behaviour, olfaction, ion-channel activity, and  
348 developmental processes (**Fig. 6**). Of genes with elevated  $\omega$  in non-cold-tolerant species we  
349 identified 50 enriched GO terms (Biological Processes: Molecular Functions: Cellular  
350 Components = 34:3:13) (FDR < 0.1) (**Supplementary Table 7**), which semantically cluster into  
351 the following categories: proteasome-mediated ubiquitin-dependent protein catabolic  
352 process, reproductive processes, response to fungus, animal organ morphogenesis,  
353 regulation of biological and cellular processes (**Fig. 6**). Moreover, DAVID identified 11  
354 functional group clusters for genes with significantly higher  $\omega$  in cold-tolerant species  
355 (**Supplementary Table 8**) including: Nucleotide-binding, Olfaction, Transmembrane proteins,  
356 Neural development, Leucine-rich repeat containing proteins, GTPase / GTP binding,  
357 Cytoskeleton / Microtubule, and Ion Transport. Finally, DAVID identified 3 functional group  
358 clusters for genes with significantly higher  $\omega$  in cold-tolerant species (**Supplementary Table**  
359 **9**) including: calcium-binding EGF domain containing proteins, Transmembrane proteins, and  
360 Cytoskeleton / Microtubule.

361  
362  
363  
364  
365

## 366 Population resequencing

367

368 A total of 4,802,266 SNPs were analysed. Of these, 1,669,212 (35%) could be placed on the  
369 main linkage groups. Using an FDR threshold of  $q < 0.05$ , a total of 29,556 SNPs were  
370 identified as outliers (10,113 could be placed on linkage groups, **Supplementary Figures 8-**  
371 **10**). The outlier SNPs that could be placed on linkage groups were not randomly distributed  
372 throughout the genome (**Supplementary Figures 9-10**) (Chi-squared = 9087.7,  $df = 4$ ,  $p <$   
373  $0.001$ ). When the proportion of the total genome length of each chromosome was used to  
374 calculate the expected numbers of SNPs, there was still a significant deviation (Chi-squared =  
375 9541.1,  $df = 4$ ,  $p < 0.001$ ). There were more observed outlier SNPs on the X-chromosome  
376 (5,840) than expected (1,977). However, these results should be taken with caution because  
377 the SNP counts on each chromosome are not completely independent due to LD between  
378 SNPs (**Supplementary Figure 10**). In the three pairwise analyses, results were qualitatively  
379 similar. The numbers of SNPs in each comparison along with the number of outlier SNPs are  
380 presented in (**Supplementary Table 10**).

381

382 There were fewer polymorphic SNPs between the Colorado and Vancouver populations and  
383 there were also fewer outlier SNPs in this comparison (**Supplementary Table 10**,  
384 **Supplementary Figure 11**). As above, the outlier SNPs are not randomly distributed  
385 throughout the genome (**Fig. 7 and Supplementary Figure 12**). There was a significant  
386 excess of outlier SNPs on the X-chromosome in all pairwise comparisons (Colorado: Oulanka  
387 – Chi-squared = 3,029.4,  $d.f. = 4$ ,  $p < 0.01$ ; Colorado: Vancouver - Chi-squared = 31.9,  $d.f. = 4$ ,  
388  $p < 0.01$ ; Oulanka: Vancouver - Chi-squared = 2477.7,  $d.f. = 4$ ,  $p < 0.01$ ). These results held  
389 when the proportion of the total genome length of each chromosome was taken to calculate  
390 the expected numbers of SNPs. There were no shared outlier SNPs between all three  
391 pairwise comparisons but there were some shared outlier SNPs between pairs of population  
392 comparisons and the majority of outlier SNPs were private to each comparison  
393 (**Supplementary Figure 13A**).

394

395 To examine patterns of divergence at the gene level we considered a gene to be  
396 differentiated if it contained a significantly differentiated SNP (with 1kb) (**Supplemental**  
397 **Table 20**). Significant SNPs were found in 1801, 155, and 1387 genes (from pairwise  
398 comparisons between Colorado: Oulanka, Colorado: Vancouver, and Oulanka: Vancouver  
399 respectively). 10 genes overlapped between all the three pairwise comparisons  
400 (**Supplementary Figure 13B, Supplemental Table 11**). Although this is a relatively small  
401 number of genes, it is significantly greater than expected by chance ( $p = 0.00013$ ). By ranking  
402 genes by  $q$ -value we could identify GO terms enriched in genes with high divergence for  
403 each population comparison (Colorado: Oulanka = 74 (Biological Processes: Molecular  
404 Functions: Cellular Components = 27:29:18) (**Supplemental Table 12**), Colorado: Vancouver  
405 = 66 (Biological Processes: Molecular Functions: Cellular Components = 19:28:19)  
406 (**Supplemental Table 13**), Oulanka: Vancouver = 91 (Biological Processes: Molecular  
407 Functions: Cellular Components = 37:39:14) (**Supplemental Table 14**). As with genes, there  
408 was a significant overlap of enriched GO-terms between population comparisons ( $N = 22$ ,  $p$   
409  $= 1.74 \times 10^{-79}$ , **Supplementary Figure 13B, Supplemental Table 15**). Semantic clustering of  
410 GO terms (**Fig. 8**) and functional clustering (**Supplemental Table 16-18**) showed that the

411 dominant terms include: membrane components, ion transport, small molecule binding, and  
412 neuron / synaptic associated terms.

413

414 **Intraspecific and Interspecific divergence**

415

416 We examined whether genes showing significant divergence between populations were the  
417 same as those showing higher rates of evolution between cold-tolerant and non-cold-  
418 tolerant species. We found 68 genes that had both an elevated rate of evolution between  
419 species and significant divergence in at least one population comparison (**Supplemental**  
420 **Table 19**). This is significantly greater than we would expect by chance (Fisher's exact test =  
421 1.447,  $p = 0.0006$ ) and implies that genes under divergent selection within species are also  
422 more likely to diverge between species.

423

## 424 Discussion

425

426 Ecological studies with *Drosophila montana* have shown that it is able to thrive at high  
427 latitudes due to a number of adaptations including the evolution of increased cold tolerance  
428 and reproductive diapause. By sequencing the genome of this species we were able to use  
429 comparative genomics to identify genes and functional processes that differ between *D.*  
430 *montana* and its less cold-adapted relatives. We find evidence for selection acting on  
431 neuronal, membrane-transport and ion-transport related genes at both the inter- and intra-  
432 specific levels. These findings likely result from selection for an ability to overwinter under  
433 harsh environmental conditions, as these processes have clear links to both increased cold  
434 tolerance and reproductive diapause.

435

## 436 Genome assembly and features

437

438 We assembled the *D. montana* genome using a combination of Illumina paired-end reads  
439 and mate-pair reads. We annotated 13,683 genes, which is comparable to other *Drosophila*  
440 species that have been sequenced [68]. 10,898 of these genes (80 %) were then assigned to  
441 a *D. virilis* ortholog, comparable to the number of orthologs identified between *D.*  
442 *melanogaster* and *D. simulans*. Together with the high BUSCO and CEGMA scores, this  
443 suggests that the genic component of the assembled genome is largely complete and  
444 successfully annotated.

445

## 446 Inter- and intra- specific comparisons show evidence for cold adaptation

447

448 We used three separate comparisons to identify genes potentially involved in adaptive  
449 divergence: between cold-tolerant and non-cold-tolerant *Drosophila* species, between *D.*  
450 *montana* and its sister species *D. virilis*, and between three populations of *D. montana* from  
451 different biogeographic localities.

452

453 Firstly, in the comparison between multiple *Drosophila* species, we identified 250 genes with  
454 an elevated rate of evolution between cold-tolerant and non-cold-tolerant *Drosophila*  
455 species. Interestingly, the increased rate of evolution was biased toward cold-tolerant  
456 species, with 77% of these genes showing a higher rate of evolution in these species.  
457 Secondly, we compared *D. montana* to its sequenced relative *D. virilis*. Although *D. montana*  
458 and *D. virilis* are both relatively cold-tolerant species, *D. montana* is significantly more cold-  
459 tolerant than *D. virilis* [29], and *D. montana* is also more desiccation tolerant (Kellerman et  
460 al. 2012). In addition, unlike *D. virilis*, *D. montana* females enter reproductive diapause in  
461 late summer, which further increases their chances to survive over the cold season and  
462 produce progeny in spring [69]. However, genes in the *D. montana* genome showed little  
463 evidence for divergent selection when compared to *D. virilis*, most genes showing evidence  
464 for purifying selection. Finally, we compared *D. montana* populations from Oulanka,  
465 Colorado and Vancouver. These populations face quite different abiotic and biotic conditions  
466 throughout the year, and hence can be expected to vary in several traits affecting flies' life-  
467 cycle and stress tolerances. We identified many SNPs that show significant divergence  
468 between the three populations; the number of divergent SNPs was smallest between

469 Colorado and Vancouver populations reflecting the later divergence times of these  
470 populations. Although no divergent SNPs were shared between all population comparisons,  
471 when SNPs were grouped by gene, we found evidence for a significant number of  
472 overlapping genes. Divergent SNPs were overrepresented in the X chromosome which often  
473 shows elevated rates of evolution due to a combination of effects including a smaller  
474 effective population size, increased efficacy of selection in hemizygous males, and sexual  
475 antagonism. However, as some of the populations are known to differ in sexual behaviour  
476 and post-mating pre-zygotic reproductive barriers [26,27], as well as ecological adaptations,  
477 it is not possible to distinguish among the multiple possible sources of any divergent  
478 selection on X-linked SNPs.

479

480 In most of these comparisons the genes with elevated dN/dS or  $F_{ST}$  were enriched for  
481 functional processes previously demonstrated as important in cold adaptation (see below).  
482 In particular changes to membrane components and ion transport, as well as in the  
483 neurological system were heavily represented in our enrichment analyses in each  
484 comparison. In addition, we also found enrichment of many small-molecule binding terms,  
485 but these tended to be more varied across the different comparisons. Finally several  
486 comparisons were also enriched for many reproduction-associated terms, which are unlikely  
487 to be linked to cold adaptation per se. We discuss each of these functional groups below.

488

#### 489 **Functional processes enriched in inter- and intra- specific comparisons**

490

##### 491 *Cellular membranes*

492

493 The composition of the cell membrane is critical for maintenance of cellular function in sub-  
494 optimal temperatures [70,71]. We found enrichment of many terms associated with  
495 membrane structure (e.g. intrinsic component of membrane, integral component of  
496 membrane, plasma membrane, transmembrane region, etc) across all our comparisons,  
497 providing further evidence for the importance of adjusting cell membrane structure to  
498 better survive in cold environments. In addition to these terms we also found enrichment of  
499 other key processes that likely contribute to the functioning of cell membranes at low  
500 temperatures. The most important of these are functions associated with cellular ionic  
501 balance (e.g. ion channel activity, transmembrane transporter activity, calcium transport, ion  
502 binding). Many of the mechanisms involved in the maintenance of cellular ion balance are  
503 known to be temperature specific [72,73]. Failure to maintain the ionic balance of cells leads  
504 to metabolic perturbations which can cause a wide range of negative consequences,  
505 including cellular damage and even death [74,75]. One class of cells particularly affected by  
506 low temperature are neurons [76–78] which are particularly susceptible to cold injury [79].  
507 In line with this we also found enrichment of several terms related to neuron function (cell  
508 projection membrane, dendrite membrane, signal transducer activity, etc.). Finally, we  
509 observed that membrane, ion transport, and neuronal terms often functionally clustered  
510 together, showing that changes to each of these functions are in fact interrelated. Taken  
511 together this suggests that the adjustment of cell membranes for increased cold tolerance is  
512 complex, requiring changes to many genes to improve cellular functioning at low  
513 temperatures.



514

515 *Small-molecule binding*

516

517 We observed enrichment of many small-molecule binding terms (small-molecule binding,  
518 ATP-binding, kinase, nucleotide-binding, nucleotide phosphate-binding, carbohydrate  
519 derivative binding, ribonucleotide binding, anion binding, etc.), both in the population and in  
520 the multi-species comparisons. At low temperatures the activity levels of many reactions are  
521 reduced meaning that during cold adaptation there is selection to adjust chemical reactions  
522 to work better in cold environments [80]. In particular ATP-binding and associated terms  
523 were enriched in most of our comparisons suggesting that adjustments to ATP-binding may  
524 be particularly important for cold adaptation. This finding is supported by the fact that low  
525 temperatures adversely affect ATP metabolism across a broad range of taxa [81,82].

526

527 *Reproduction*

528

529 Genes involved in reproduction typically show faster rates of divergence than other genes  
530 [83,84]. Consistent with this we find reproductive-associated terms (male courtship  
531 behaviour, single organism reproductive process, reproductive process) are enriched at each  
532 comparison level. Different species of *Drosophila* (including *D. montana* and *D. virilis*) are  
533 known to vary for a number of reproductive traits and so this finding is not too surprising.  
534 Interestingly, the only pairwise population comparison that shows enrichment for  
535 reproductive-associated terms (reproductive structure development, gonad development) is  
536 between Colorado and Vancouver. Although all populations show some evidence of  
537 reproductive isolation, crosses between Colorado and Vancouver showed the highest  
538 proportion of non-developing eggs [27]. Moreover, although the exact cause of non-  
539 developing eggs is unknown, one possibility is that it could be due to a negative interaction  
540 between sperm and the female reproductive tract. Some support for this idea comes from  
541 examining the top differentiated genes between Colorado and Vancouver which include the  
542 transcription factor *ken* and *barbie* which has a major role in the development of genitalia of  
543 *D. melanogaster* [85].

544

545 *Olfaction*

546

547 *Drosophila* flies have various kinds of olfaction-driven behaviors including the location of  
548 food and mates [86,87] and the genomic repertoire of olfactory loci is correlated with  
549 environmental variation [88]. A cold environment may affect the perception of olfactory  
550 signals as the detection of odorants at low temperatures is more difficult due to the reduced  
551 concentration of olfactory cues in the air. Previous work in *D. melanogaster* has shown that  
552 the sensitivity of the olfactory system increases in response to cold temperature (e. g.  
553 Dalton [89]), and that this change is accompanied by a change in expression in olfactory  
554 genes [90,91]. Since both sexual and non-sexual olfactory signals are likely to be affected by  
555 colder temperatures we hypothesize that the changes in olfaction-related genes we observe  
556 in the present study are a product of adaptation to living in a colder environment as well as  
557 of sexual selection to distinguish conspecific flies from the heterospecific ones.

558



559 **Intraspecific and interspecific divergence**

560

561 Phenotypic variation in traits between and within species may or may not arise from the  
562 same genes [92]. Here we find that genes showing divergence between populations were  
563 also more likely to show differences between species. The functions of these genes mirror  
564 those enriched in each of the separate comparisons (transmembrane transport / ion  
565 transport (9/68), sexual reproduction (16/68), and neurological system  
566 process/neurogenesis (15/68)), implicating these genes' involvement in similar differences in  
567 cold adaptation and reproduction between populations and species. Although any of these  
568 genes may be important in cold adaptation, one gene in particular, *Task6*, stands out as an  
569 interesting candidate. *Task6* encodes a subunit of two-pore domain potassium (K2P)  
570 channels, which are important in setting the membrane potential and input resistance of  
571 neurons in *Drosophila* [93]. Temperature impacts a cells ability to maintain ionic balance,  
572 and in particular loss of potassium ion balance has been shown to cause membrane  
573 depolarization, induction of chill-coma, and cell death [13,94]. As such the changes we  
574 observe in *Task6* may be involved in thermal adaptation of species and populations.

575

576 **Conclusion**

577

578 *D. montana* is an exceptional species of *Drosophila* in terms of cold adaptation, as well as a  
579 species used for studies of behavioural variation and reproductive isolation. Here we report  
580 the first description of its genome. Although there are few strong signals of divergent  
581 selection on coding sequence variation, contrasts between cold-adapted species and  
582 intraspecific population sequencing suggest that the genome contains a clear signal of  
583 selection for cold tolerance. We identify many genes potential important in adaptation and  
584 speciation in this ecological specialist species.

585

586

587 **DATA AVAILABILITY**

588

589 This project has been deposited at NCBI under the BioProject accession PRJNA312336. The  
590 accession number for the assembly is LUVX00000000. Raw reads were deposited in the SRA  
591 under the following accession numbers: mate-pair reads: SRX1604922, paired-end reads:  
592 SRX1602883, SRX1602879, population resequencing reads: SRX1625831, SRX1625832,  
593 SRX1625834.

594

595

596 **ACKNOWLEDGEMENTS**

597

598 We would like to thank Paris Veltsos for help with DNA extractions, and RAPiD Genomics (FL,  
599 USA) for help with probe design, library preparation, sequencing and initial analysis of the  
600 SNP data for the linkage map. The work has been supported by the Academy of Finland to  
601 AH (projects 132619 and 267244) and to MK. (projects 268214 and 272927) and NERC (UK)  
602 funding to MGR (grants NE/E015255/1 and NE/J020818/1) and PhD studentship to DJP  
603 (NE/I528634/1).

604

605

606

607 **REFERENCES**

608

609 1. Nosil P, Funk DJ, Ortiz-Barrientos D. Divergent selection and heterogeneous genomic  
610 divergence. *Mol Ecol.* 2009;18:375–402.

611 2. Smadja CM, Butlin RK. A framework for comparing processes of speciation in the presence  
612 of gene flow. *Mol Ecol.* 2011;20:5123–40.

613 3. Noor MA, Bennett SM. Islands of speciation or mirages in the desert? Examining the role  
614 of restricted recombination in maintaining species. *Heredity.* 2009;103:439.

615 4. Cruickshank TE, Hahn MW. Reanalysis suggests that genomic islands of speciation are due  
616 to reduced diversity, not reduced gene flow. *Mol Ecol.* 2014;23:3133–3157.

617 5. Ravinet M, Faria R, Butlin RK, Galindo J, Bierne N, Rafajlović M, et al. Interpreting the  
618 genomic landscape of speciation: a road map for finding barriers to gene flow. *J Evol Biol.*  
619 2017;30:1450–1477.

620 6. Wolf JBW, Ellegren H. Making sense of genomic islands of differentiation in light of  
621 speciation. *Nat Rev Genet.* 2017;18:87–100.

622 7. Matzkin LM, Watts TD, Bitler BG, Machado CA, Markow TA. Functional genomics of cactus  
623 host shifts in *Drosophila mojavensis*. *Mol Ecol.* 2006;15:4635–4643.

624 8. Smith G, Fang Y, Liu X, Kenny J, Cossins AR, Oliveira CC, et al. Transcriptome-wide  
625 expression variation associated with environmental plasticity and mating success in  
626 cactophilic *Drosophila mojavensis*. *Evolution.* 2013;67:1950–1963.

627 9. McKenna DD, Scully ED, Pauchet Y, Hoover K, Kirsch R, Geib SM, et al. Genome of the  
628 Asian longhorned beetle (*Anoplophora glabripennis*), a globally significant invasive species,  
629 reveals key functional and evolutionary innovations at the beetle–plant interface. *Genome*  
630 *Biol.* 2016;17:227.

631 10. Chen C, Liu Z, Pan Q, Chen X, Wang H, Guo H, et al. Genomic analyses reveal  
632 demographic history and temperate adaptation of the newly discovered honey bee  
633 subspecies *Apis mellifera sinixinyuan* n. ssp. *Mol Biol Evol.* 2016;33:1337–1348.

634 11. Foll M, Gaggiotti OE, Daub JT, Vatsiou A, Excoffier L. Widespread signals of convergent  
635 adaptation to high altitude in Asia and America. *Am J Hum Genet.* 2014;95:394–407.

636 12. Kellermann V, Loeschcke V, Hoffmann AA, Kristensen TN, Flojgaard C, David JR, et al.  
637 Phylogenetic constraints in key functional traits behind species' climate niches: patterns of  
638 desiccation and cold resistance across 95 *Drosophila* species. *Evolution.* 2012;66:3377–3389.

639 13. Andersen JL, Manenti T, Sørensen JG, MacMillan HA, Loeschcke V, Overgaard J. How to  
640 assess *Drosophila* cold tolerance: chill coma temperature and lower lethal temperature are  
641 the best predictors of cold distribution limits. *Funct Ecol.* 2015;29:55–65.

642 14. Tyukmaeva VI, Salminen TS, Kankare M, Knott KE, Hoikkala A. Adaptation to a seasonally  
643 varying environment: a strong latitudinal cline in reproductive diapause combined with high  
644 gene flow in *Drosophila montana*. *Ecol Evol.* 2011;1:160–168.

- 645 15. Vesala L, Hoikkala A. Effects of photoperiodically induced reproductive diapause and cold  
646 hardening on the cold tolerance of *Drosophila montana*. J Insect Physiol. 2011;57:46–51.
- 647 16. Kauranen H, Menegazzi P, Costa R, Helfrich-Förster C, Kankainen A, Hoikkala A. Flies in  
648 the north: locomotor behavior and clock neuron organization of *Drosophila montana*. J Biol  
649 Rhythms. 2012;27:377–387.
- 650 17. Kauranen H, Ala-Honkola O, Kankare M, Hoikkala A. Circadian clock of *Drosophila*  
651 *montana* is adapted to high variation in summer day lengths and temperatures prevailing at  
652 high latitudes. J Insect Physiol. 2016;89:9–18.
- 653 18. Terhzaz S, Teets NM, Cabrero P, Henderson L, Ritchie MG, Nachman RJ, et al. Insect capa  
654 neuropeptides impact desiccation and cold tolerance. Proc Natl Acad Sci U S A [Internet].  
655 2015 [cited 2015 Feb 21]; Available from:  
656 <http://www.pnas.org/content/early/2015/02/12/1501518112.short>
- 657 19. Menegazzi P, Dalla Benetta E, Beauchamp M, Schlichting M, Steffan-Dewenter I, Helfrich-  
658 Förster C. Adaptation of circadian neuronal network to photoperiod in high-latitude  
659 European drosophilids. Curr Biol. 2017;27:833–839.
- 660 20. Spicer GS, Bell CD. Molecular phylogeny of the *Drosophila virilis* species group (Diptera:  
661 Drosophilidae) inferred from mitochondrial 12S and 16S ribosomal RNA genes. Ann Entomol  
662 Soc Am. 2002;95:156–161.
- 663 21. Throckmorton LH. The virilis species group. In: Ashburner M, Carson HL, Thompson JN,  
664 editors. Genet Biol Drosoph. London, UK: Academic Press; 1982. p. 227–296.
- 665 22. Ostrega MS. Restriction endonuclease analysis of the relatedness of *D. montana* and *D.*  
666 *virilis* lines. Drosoph Inf Serv. 1985;61:132–133.
- 667 23. Mirol PM, Schäfer MA, Orsini L, Routtu J, Schlötterer C, Hoikkala A, et al.  
668 Phylogeographic patterns in *Drosophila montana*. Mol Ecol. 2007;16:1085–1097.
- 669 24. Lankinen P, Tyukmaeva VI, Hoikkala A. Northern *Drosophila montana* flies show variation  
670 both within and between cline populations in the critical day length evoking reproductive  
671 diapause. J Insect Physiol. 2013;59:745–751.
- 672 25. Tyukmaeva VI, Veltsos P, Slate J, Gregson E, Kauranen H, Kankare M, et al. Localization of  
673 quantitative trait loci for diapause and other photoperiodically regulated life history traits  
674 important in adaptation to seasonally varying environments. Mol Ecol. 2015;24:2809–19.
- 675 26. Klappert K, Mazzi D, Hoikkala A, Ritchie MG. Male courtship song and female preference  
676 variation between phylogeographically distinct populations of *Drosophila montana*.  
677 Evolution. 2007;61:1481–1488.
- 678 27. Jennings JH, Snook RR, Hoikkala A. Reproductive isolation among allopatric *Drosophila*  
679 *montana* populations. Evolution. 2014;68:3095–3108.
- 680 28. Schäfer MA, Mazzi D, Klappert K, Kauranen H, Vieira J, Hoikkala A, et al. A microsatellite  
681 linkage map for *Drosophila montana* shows large variation in recombination rates, and a  
682 courtship song trait maps to an area of low recombination. J Evol Biol. 2010;23:518–527.

- 683 29. Vesala L, Salminen TS, Laiho A, Hoikkala A, Kankare M. Cold tolerance and cold-induced  
684 modulation of gene expression in two *Drosophila virilis* group species with different  
685 distributions. *Insect Mol Biol.* 2012;21:107–118.
- 686 30. Salminen TS, Vesala L, Laiho A, Merisalo M, Hoikkala A, Kankare M. Seasonal gene  
687 expression kinetics between diapause phases in *Drosophila virilis* group species and  
688 overwintering differences between diapausing and non-diapausing females. *Sci Rep.* 2015;5.
- 689 31. Parker DJ, Vesala L, Ritchie MG, Laiho A, Hoikkala A, Kankare M. How consistent are the  
690 transcriptome changes associated with cold acclimation in two species of the *Drosophila*  
691 *virilis* group? *Heredity.* 2015;
- 692 32. Kankare M, Parker DJ, Merisalo M, Salminen TS, Hoikkala A. Transcriptional differences  
693 between diapausing and non-diapausing *D. montana* females reared under the same  
694 photoperiod and temperature. *PLoS One.* 2016;11:e0161852.
- 695 33. Parker DJ, Ritchie MG, Kankare M. Preparing for Winter: the Transcriptomic Response  
696 Associated with Different Day Lengths in *Drosophila montana*. *G3 GenesGenomesGenetics.*  
697 2016;g3.116.027870.
- 698 34. Routtu J, Mazzi D, Van Der Linde K, Mirol P, Butlin RK, Hoikkala A. The extent of variation  
699 in male song, wing and genital characters among allopatric *Drosophila montana* populations.  
700 *J Evol Biol.* 2007;20:1591–1601.
- 701 35. Lakovaara S. Malt as a culture medium for *Drosophila* species. *Drosoph Inf Serv.*  
702 1969;44:128.
- 703 36. Buffalo V. Scythe. Available at <https://github.com/vsbuffalo/scythe>; 2014.
- 704 37. Joshi NA, Fass JN. Sickle: A sliding-window, adaptive, quality-based trimming tool for  
705 FastQ files. Available at <https://github.com/najoshi/sickle>.; 2011.
- 706 38. Li H, Durbin R. Fast and accurate short read alignment with Burrows–Wheeler transform.  
707 *Bioinformatics.* 2009;25:1754–1760.
- 708 39. Schmieder R, Edwards R. Fast Identification and Removal of Sequence Contamination  
709 from Genomic and Metagenomic Datasets. *PLOS ONE.* 2011;6:e17288.
- 710 40. Parra G, Bradnam K, Korf I. CEGMA: a pipeline to accurately annotate core genes in  
711 eukaryotic genomes. *Bioinformatics.* 2007;23:1061–1067.
- 712 41. Parra G, Bradnam K, Ning ZM, Keane T, Korf I. Assessing the gene space in draft  
713 genomes. *Nucleic Acids Res.* 2009;37:289–297.
- 714 42. Simão FA, Waterhouse RM, Ioannidis P, Kriventseva EV, Zdobnov EM. BUSCO: assessing  
715 genome assembly and annotation completeness with single-copy orthologs. *Bioinforma Oxf*  
716 *Engl.* 2015;31:3210–2.
- 717 43. Holt C, Yandell M. MAKER2: an annotation pipeline and genome-database management  
718 tool for second-generation genome projects. *BMC Bioinformatics.* 2011;12:491.
- 719 44. Paterson T, Law A. Genotypechecker: an interactive tool for checking the inheritance  
720 consistency of genotyped pedigrees. *Anim Genet.* 2011;42:560–2.

- 721 45. Broman KW, Wu H, Sen S, Churchill GA. R/qtl: QTL mapping in experimental crosses.  
722 Bioinformatics. 2003;19:889–90.
- 723 46. Löytynoja A, Goldman N. An algorithm for progressive multiple alignment of sequences  
724 with insertions. Proc Natl Acad Sci U S A. 2005;102:10557–10562.
- 725 47. Yang ZH. PAML: a program package for phylogenetic analysis by maximum likelihood.  
726 Comput Appl Biosci. 1997;13:555–556.
- 727 48. Yang ZH, Bielawski JP. Statistical methods for detecting molecular adaptation. Trends  
728 Ecol Evol. 2000;15:496–503.
- 729 49. Angelis K, Dos Reis M, Yang Z. Bayesian estimation of nonsynonymous/synonymous rate  
730 ratios for pairwise sequence comparisons. Mol Biol Evol. 2014;31:1902–13.
- 731 50. Sackton TB, Lazzaro BP, Schlenke TA, Evans JD, Hultmark D, Clark AG. Dynamic evolution  
732 of the innate immune system in *Drosophila*. Nat Genet. 2007;39:1461–1468.
- 733 51. Haerty W, Jagadeeshan S, Kulathinal RJ, Wong A, Ravi Ram K, Sirot LK, et al. Evolution in  
734 the fast lane: rapidly evolving sex-related genes in *Drosophila*. Genetics. 2007;177:1321–  
735 1335.
- 736 52. Jennings JH, Mazzi D, Ritchie MG, Hoikkala A. Sexual and postmating reproductive  
737 isolation between allopatric *Drosophila montana* populations suggest speciation potential.  
738 BMC Evol Biol. 2011;11:68.
- 739 53. Bolger AM, Lohse M, Usadel B. Trimmomatic: a flexible trimmer for Illumina sequence  
740 data. Bioinformatics. 2014;30:2114–2120.
- 741 54. Zhu Y, Bergland AO, González J, Petrov DA. Empirical validation of pooled whole genome  
742 population re-sequencing in *Drosophila melanogaster*. PloS One. 2012;7:e41901.
- 743 55. Li H, Handsaker B, Wysoker A, Fennell T, Ruan J, Homer N, et al. The sequence  
744 alignment/map format and SAMtools. Bioinformatics. 2009;25:2078–2079.
- 745 56. Kofler R, Pandey RV, Schlötterer C. PoPoolation2: identifying differentiation between  
746 populations using sequencing of pooled DNA samples (Pool-Seq). Bioinformatics.  
747 2011;27:3435–6.
- 748 57. Foll M, Gaggiotti O. A genome-scan method to identify selected loci appropriate for both  
749 dominant and codominant markers: a bayesian perspective. Genetics. 2008;180:977–993.
- 750 58. Foll M, Fischer MC, Heckel G, Excoffier L. Estimating population structure from AFLP  
751 amplification intensity. Mol Ecol. 2010;19:4638–4647.
- 752 59. Fischer MC, Foll M, Excoffier L, Heckel G. Enhanced AFLP genome scans detect local  
753 adaptation in high-altitude populations of a small rodent (*Microtus arvalis*). Mol Ecol.  
754 2011;20:1450–1462.
- 755 60. Pérez-Figueroa A, García-Pereira MJ, Saura M, Rolán-Alvarez E, Caballero A. Comparing  
756 three different methods to detect selective loci using dominant markers. J Evol Biol.  
757 2010;23:2267–2276.

- 758 61. Vilas A, Pérez-Figueroa A, Caballero A. A simulation study on the performance of  
759 differentiation-based methods to detect selected loci using linked neutral markers. *J Evol*  
760 *Biol.* 2012;25:1364–1376.
- 761 62. Villemereuil P, Frichot É, Bazin É, François O, Gaggiotti OE. Genome scan methods  
762 against more complex models: when and how much should we trust them? *Mol Ecol.*  
763 2014;23:2006–2019.
- 764 63. Eden E, Navon R, Steinfeld I, Lipson D, Yakhini Z. GOrilla: a tool for discovery and  
765 visualization of enriched GO terms in ranked gene lists. *BMC Bioinformatics.* 2009;10:48.
- 766 64. Supek F, Bošnjak M, Škunca N, Šmuc T. REVIGO Summarizes and Visualizes Long Lists of  
767 Gene Ontology Terms. *PLOS ONE.* 2011;6:e21800.
- 768 65. Huang DW, Sherman BT, Lempicki RA. Bioinformatics enrichment tools: paths toward the  
769 comprehensive functional analysis of large gene lists. *Nucleic Acids Res.* 2009;37:1–13.
- 770 66. Huang DW, Sherman BT, Lempicki RA. Systematic and integrative analysis of large gene  
771 lists using DAVID bioinformatics resources. *Nat Protoc.* 2009;4:44–57.
- 772 67. Tweedie S, Ashburner M, Falls K, Leyland P, McQuilton P, Marygold S, et al. FlyBase:  
773 enhancing *Drosophila* Gene Ontology annotations. *Nucleic Acids Res.* 2009;37:D555–D559.
- 774 68. Clark AG, Eisen MB, Smith DR, Bergman CM, Oliver B, Markow TA, et al. Evolution of  
775 genes and genomes on the *Drosophila* phylogeny. *Nature.* 2007;450:203–218.
- 776 69. Watabe H. Photoperiodic responses in the *Drosophila virilis* species group (Diptera,  
777 Drosophilidae) from Japan. *Kontyo.* 1983;51:628–634.
- 778 70. Hazel JR. Thermal adaptation in biological membranes - is homeoviscous adaptation the  
779 explanation? *Annu Rev Physiol.* 1995;57:19–42.
- 780 71. Košťál V, Berková P, Šimek P. Remodelling of membrane phospholipids during transition  
781 to diapause and cold-acclimation in the larvae of *Chymomyza costata* (Drosophilidae). *Comp*  
782 *Biochem Physiol B Biochem Mol Biol.* 2003;135:407–419.
- 783 72. Heitler WJ, Goodman CS, Fraserrowell CH. Effects of temperature on threshold of  
784 identified neurons in locust. *J Comp Physiol.* 1977;117:163–182.
- 785 73. Kivivuori L, Lehti S, Lagerspetz KYH. Effect of temperature-acclimation on thermal-  
786 dependence and hysteresis of the resting membrane-potential of the stretch-receptor  
787 neuron in crayfish *Astacus astacus* (L). *J Therm Biol.* 1990;15:9–14.
- 788 74. Hochachka PW. Defense strategies against hypoxia and hypothermia. *Science.*  
789 1986;231:234–241.
- 790 75. Košťál V, Vambera J, Bastl J. On the nature of pre-freeze mortality in insects: water  
791 balance, ion homeostasis and energy charge in the adults of *Pyrrhocoris apterus*. *J Exp Biol.*  
792 2004;207:1509–1521.
- 793 76. Montgomery JC, Macdonald JA. Effects of temperature on nervous system: implications  
794 for behavioral performance. *Am J Physiol - Regul Integr Comp Physiol.* 1990;259:R191–6.



- 795 77. Janssen R. Thermal influences on nervous system function. *Neurosci Biobehav Rev.*  
796 1992;16:399–413.
- 797 78. Robertson RM, Money TG. Temperature and neuronal circuit function: compensation,  
798 tuning and tolerance. *Curr Opin Neurobiol.* 2012;22:724–34.
- 799 79. Hochachka PW, Somero GN. *Temperature. Biochem Adapt Mech Process Physiol Evol.*  
800 New York: Oxford University Press; 2002. p. 290–449.
- 801 80. Margesin R. *Psychrophiles: From Biodiversity to Biotechnology.* London, UK: Springer;  
802 2017.
- 803 81. Napolitano MJ, Shain DH. Four kingdoms on glacier ice: convergent energetic processes  
804 boost energy levels as temperatures fall. *Proc R Soc Lond B Biol Sci.* 2004;271:S273–6.
- 805 82. Morrison BA, Shain DH. An AMP nucleosidase gene knockout in *Escherichia coli* elevates  
806 intracellular ATP levels and increases cold tolerance. *Biol Lett.* 2008;4:53–6.
- 807 83. Swanson WJ, Vacquier VD. Reproductive Protein Evolution. *Annu Rev Ecol Syst.*  
808 2002;33:161–79.
- 809 84. Clark NL, Aagaard JE, Swanson WJ. Evolution of reproductive proteins from animals and  
810 plants. *Reproduction.* 2006;131:11–22.
- 811 85. Lukacsovich T, Yuge K, Awano W, Asztalos Z, Kondo S, Juni N, et al. The *ken and barbie*  
812 gene encoding a putative transcription factor with a BTB domain and three zinc finger motifs  
813 functions in terminalia development of *Drosophila*. *Arch Insect Biochem Physiol.*  
814 2003;54:77–94.
- 815 86. Amrein H. Pheromone perception and behavior in *Drosophila*. *Curr Opin Neurobiol.*  
816 2004;14:435–442.
- 817 87. Libert S, Zwiener J, Chu X, VanVoorhies W, Roman G, Pletcher SD. Regulation of  
818 *Drosophila* life span by olfaction and food-derived odors. *Science.* 2007;315:1133–1137.
- 819 88. Gardiner A, Barker D, Butlin RK, Jordan WC, Ritchie MG. *Drosophila* chemoreceptor gene  
820 evolution: selection, specialization and genome size. *Mol Ecol.* 2008;17:1648–1657.
- 821 89. Dalton P. Psychophysical and behavioral characteristics of olfactory adaptation. *Chem*  
822 *Senses.* 2000;25:487–492.
- 823 90. Riveron J, Boto T, Alcorta E. The effect of environmental temperature on olfactory  
824 perception in *Drosophila melanogaster*. *J Insect Physiol.* 2009;55:943–51.
- 825 91. Riveron J, Boto T, Alcorta E. Transcriptional basis of the acclimation to high  
826 environmental temperature at the olfactory receptor organs of *Drosophila melanogaster*.  
827 *BMC Genomics.* 2013;14:259.
- 828 92. Wittkopp PJ, Stewart EE, Arnold LL, Neidert AH, Haerum BK, Thompson EM, et al.  
829 Intraspecific polymorphism to interspecific divergence: genetics of pigmentation in  
830 *Drosophila*. *Science.* 2009;326:540–544.



831 93. Döring F, Scholz H, Kühnlein RP, Karschin A, Wischmeyer E. Novel Drosophila two-pore  
832 domain K<sup>+</sup> channels: rescue of channel function by heteromeric assembly. *Eur J Neurosci.*  
833 2006;24:2264–2274.

834 94. Andersen MK, Jensen SO, Overgaard J. Physiological correlates of chill susceptibility in  
835 Lepidoptera. *J Insect Physiol.* 2017;98:317–326.

836

837

838 **Table 1 | Summary statistics of *D. montana* genome assembly**

839

| <b>Metric</b>                                                                | <b>Value</b> |
|------------------------------------------------------------------------------|--------------|
| <b>Total assembled length (bp)</b>                                           | 183585048    |
| <b>Scaffolds (n)</b>                                                         | 63742        |
| <b>Scaffold N50 (bp)</b>                                                     | 40647        |
| <b>Largest scaffold (bp)</b>                                                 | 515352       |
| <b>GC content (%)</b>                                                        | 40.57        |
| <b>Number of predicted gene models</b>                                       | 13683        |
| <b>Number of predicted gene models with RBBH to <i>D. virilis</i> genome</b> | 10898        |
| <b>CEGMA pipeline analysis (% complete/partial)</b>                          | 95.97/98.39  |
| <b>BUSCO (% complete/missing)</b>                                            | 91.85/1.72   |

840

841

842

843

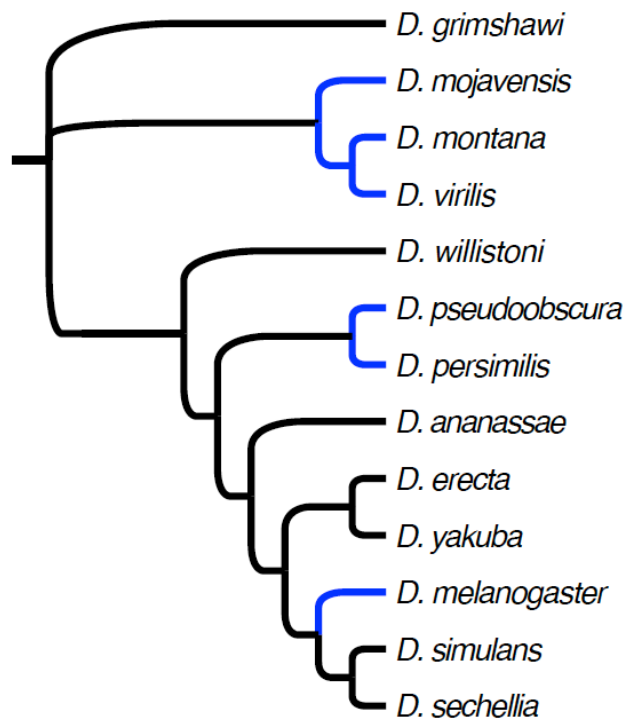

844

845 **Figure 1** | Tree used for multi-species PAML analyses. Cold-tolerant species (species that  
846 have a knockdown temperature of <math><3^{\circ}\text{C}</math>) are shown in blue (data from Kellermann et al.  
847 (2012)).

848

849

850

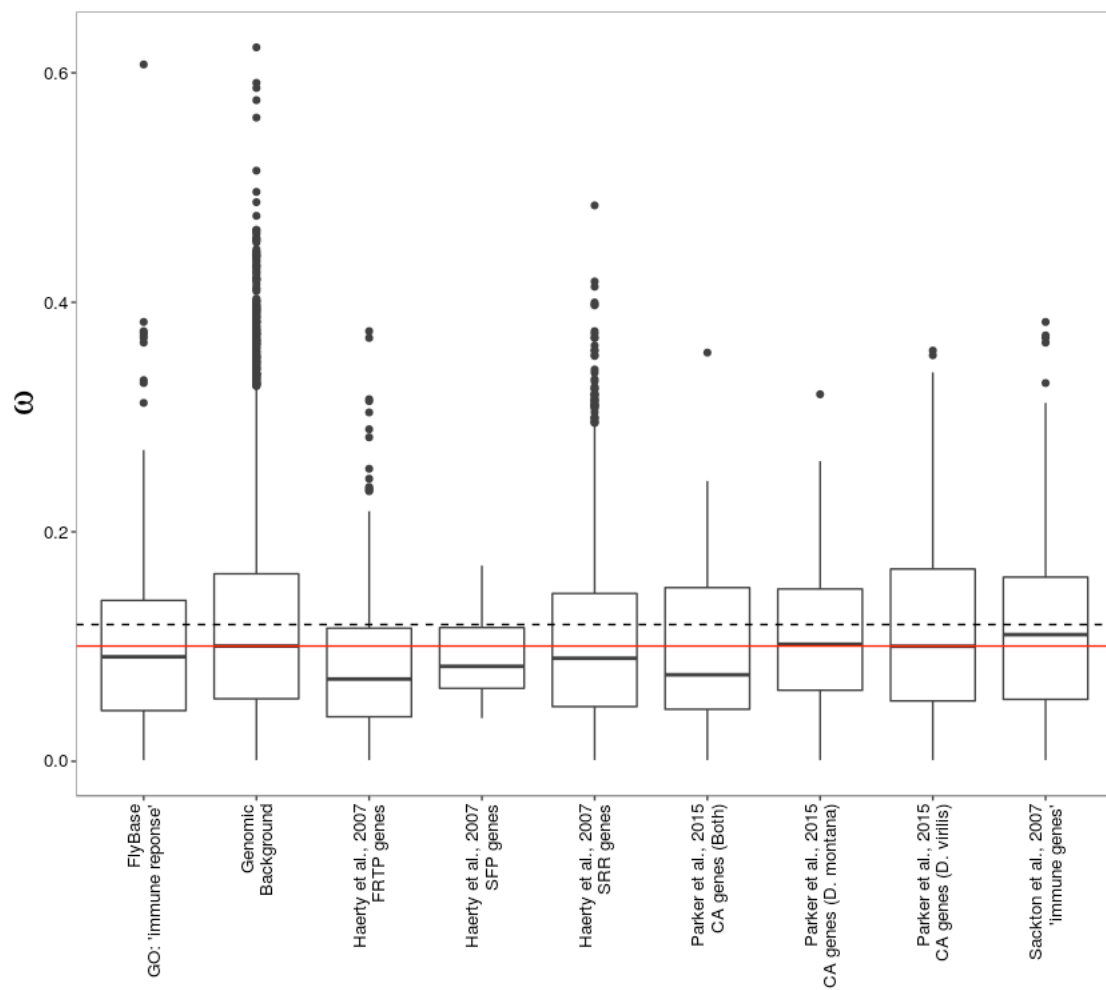

851

852

853 **Figure 2 |** Average values of  $\omega$  between *D. montana* and *D. virilis* for candidate gene sets.

854 FRTP = female reproductive tract SFP = seminal fluid proteins SRR = sex and reproduction

855 related genes CA = cold acclimation genes. The red and dashed lines indicate the median

856 and mean  $\omega$  of the genomic background respectively.

857

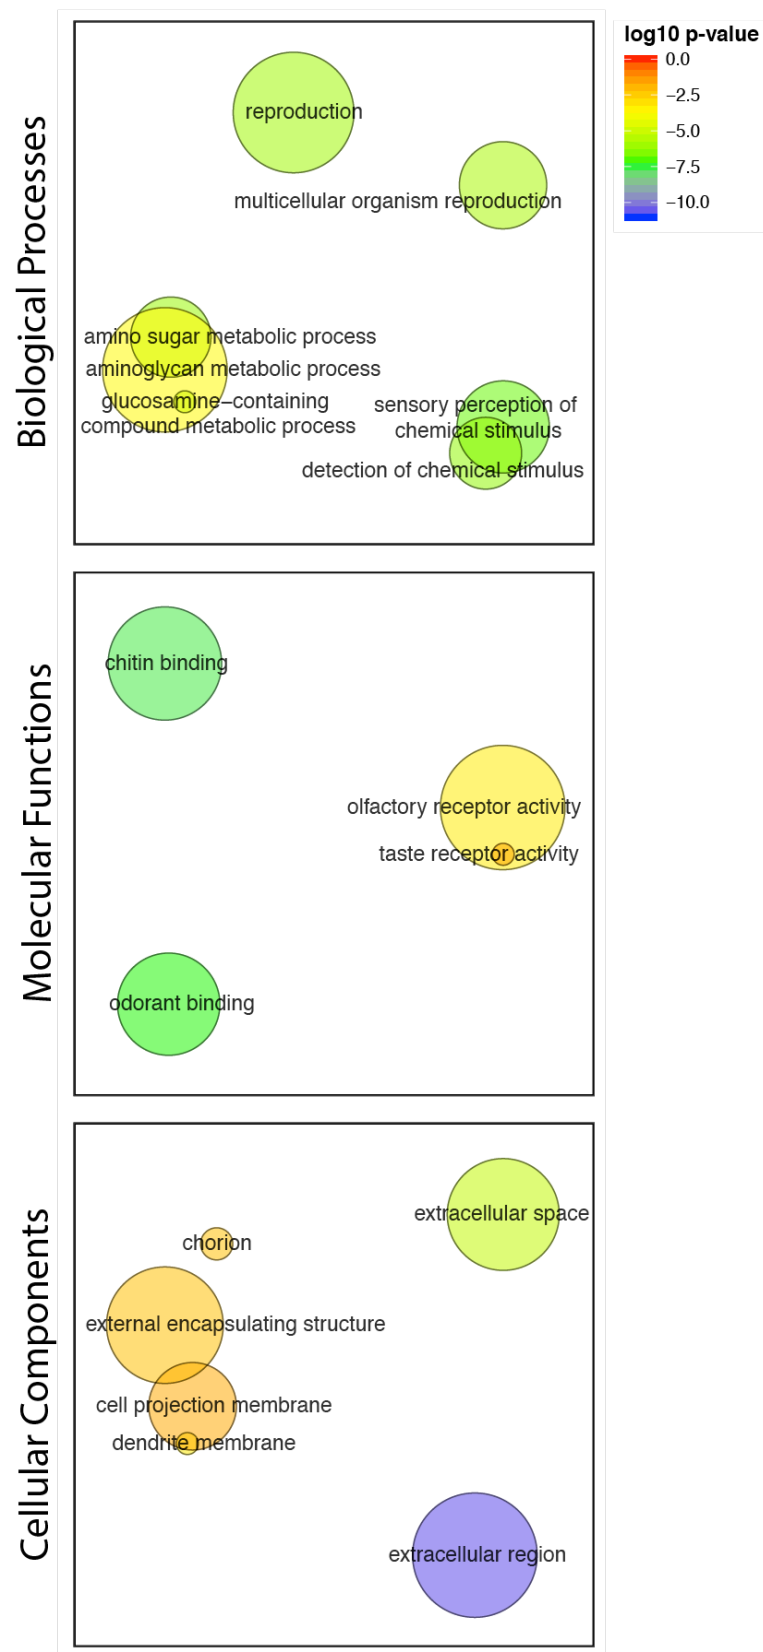

858

859 **Figure 3** | Semantic clustering of significantly (FDR < 0.1) enriched GO-terms for genes  
860 showing high dN/dS between *D. montana* and *D. virilis*. Circle size corresponds to the  
861 number of genes annotated to the term in the reference database. Circle colour indicates  
862 log<sub>10</sub> FDR of the GO term.

863

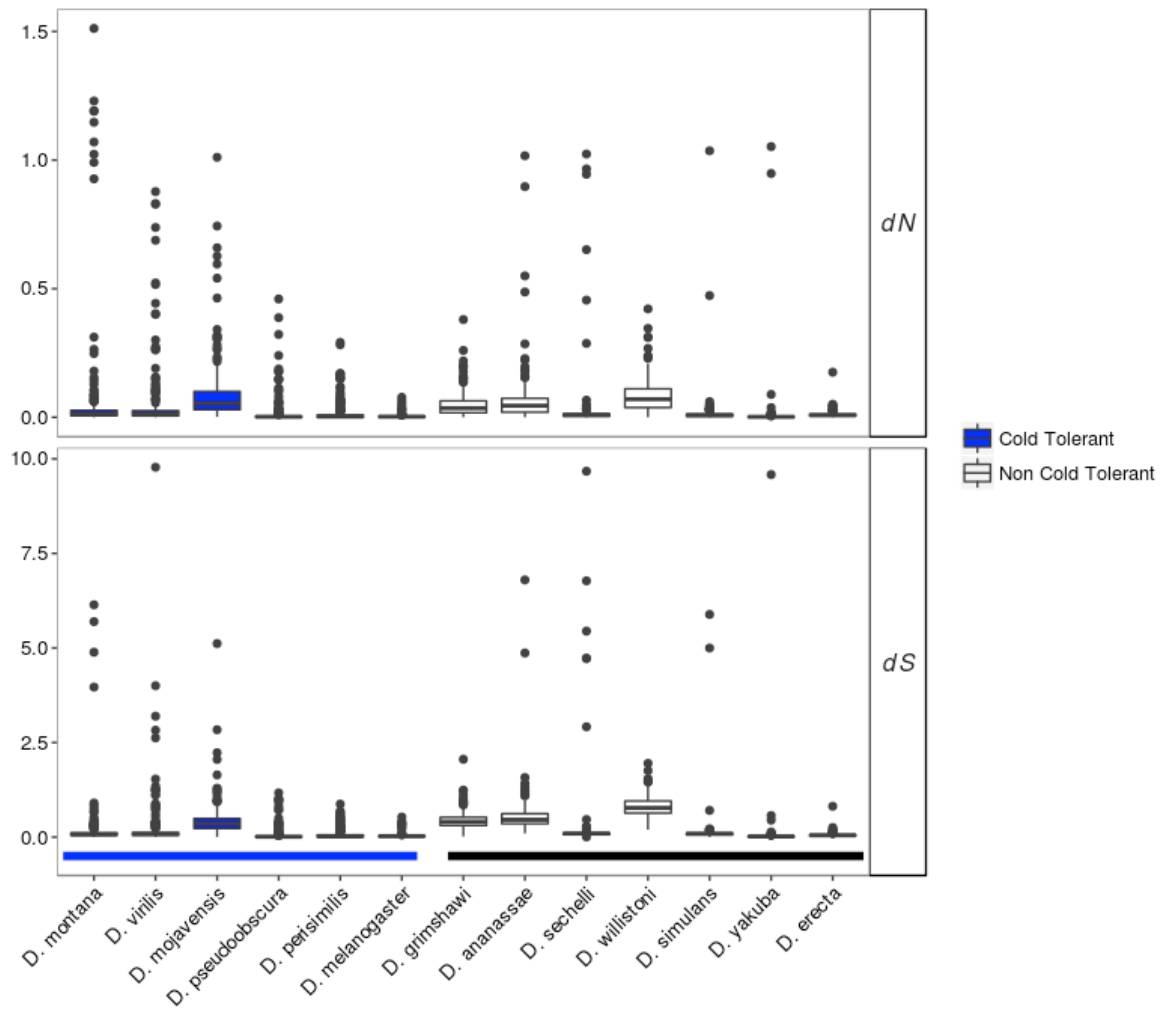

864

865 **Figure 4** | Distributions of  $dN$  and  $dS$  estimates for each of the 250 genes from 13 *Drosophila*  
866 species with significant differences in omega between cold-tolerant and non-cold-tolerant  
867 species.

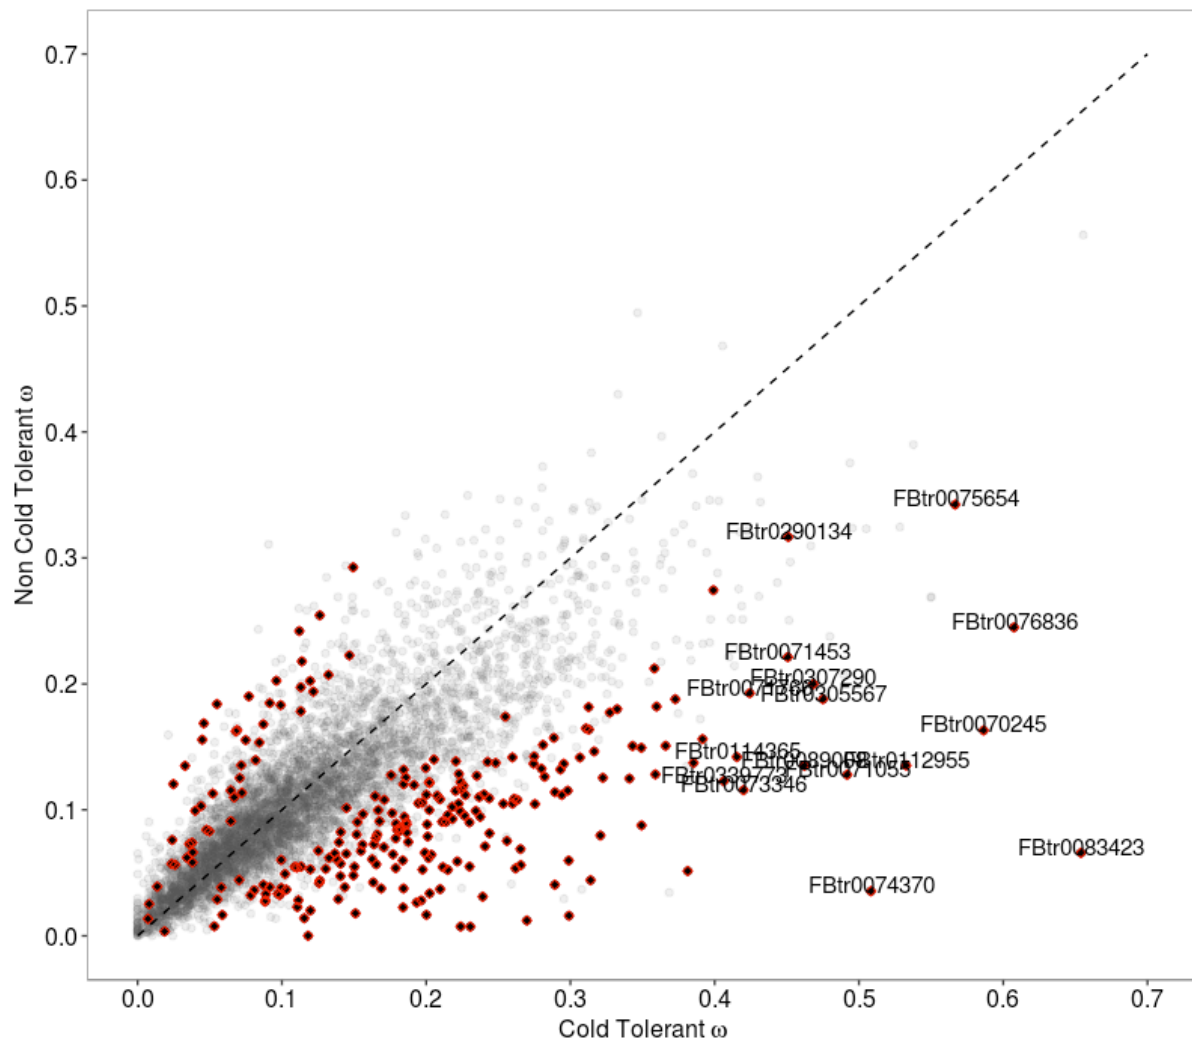

868

869 **Figure 5 |** The relationship between values of omega estimated for 5,619 genes in cold-  
870 tolerant and non-cold-tolerant species of *Drosophila*. 250 genes with significantly different  
871 estimates of omega are shown in black with red outline. Diagonal line indicates the 1-1  
872 diagonal, points below the diagonal line show elevated levels of omega in cold-tolerant  
873 species compared to non-cold-tolerant species, while points above the diagonal show  
874 elevated levels of omega in non-cold-tolerant species.

875

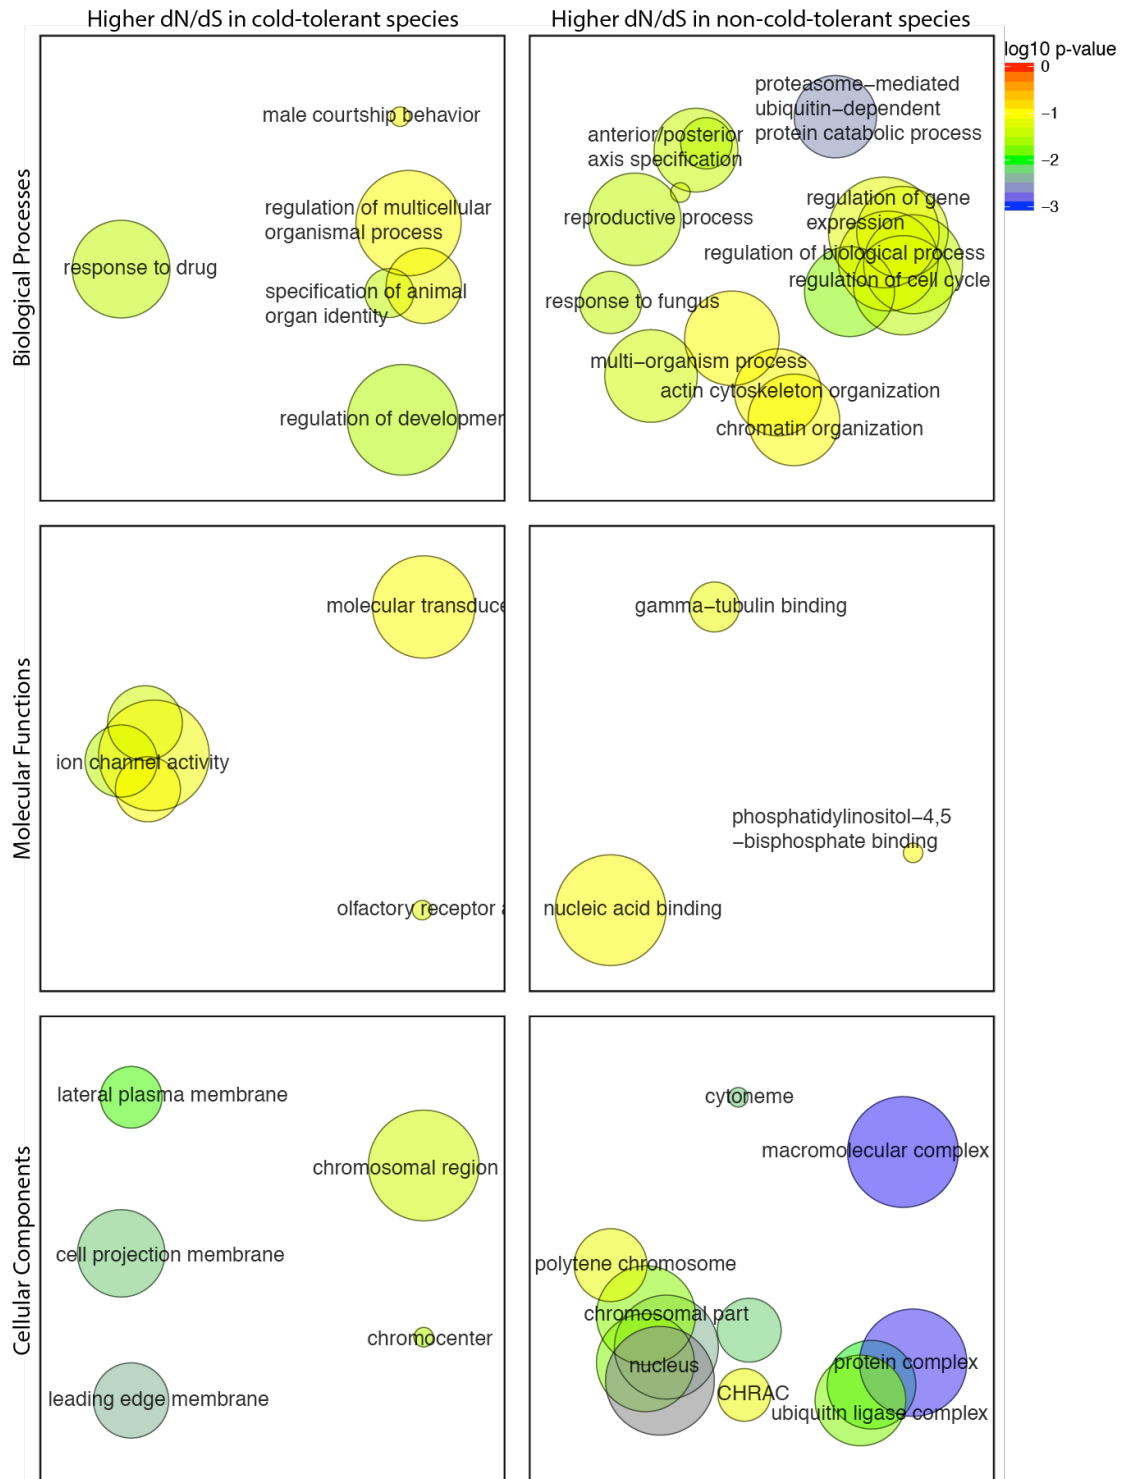

876

877

878

879

880

881

**Figure 6** | Semantic clustering of significantly (FDR < 0.1) enriched GO-terms for genes showing significantly elevated dN/dS in cold-tolerant or non-cold-tolerant species. Circle size corresponds to the number of genes annotated to the term in the reference database. Circle colour indicates log<sub>10</sub> FDR of the GO term



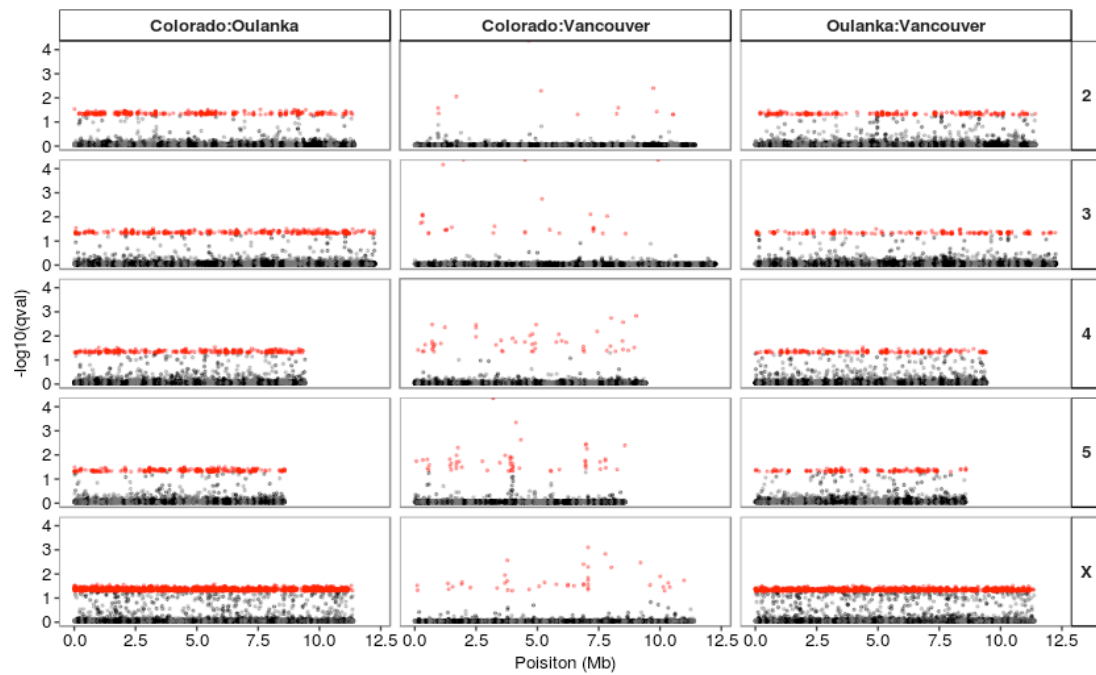

882  
883  
884  
885  
886  
887  
888

**Figure 7** | Manhattan plot of q-values from the three pairwise BayeScan analyses for the SNPs on the mapped chromosomes. Red points denote SNPs which passed the 0.05 q-value FDR threshold. Alternating grey and black points denote different scaffolds that have been anchored to the chromosomes. The order of the mapped scaffolds is established but not their orientation.

889

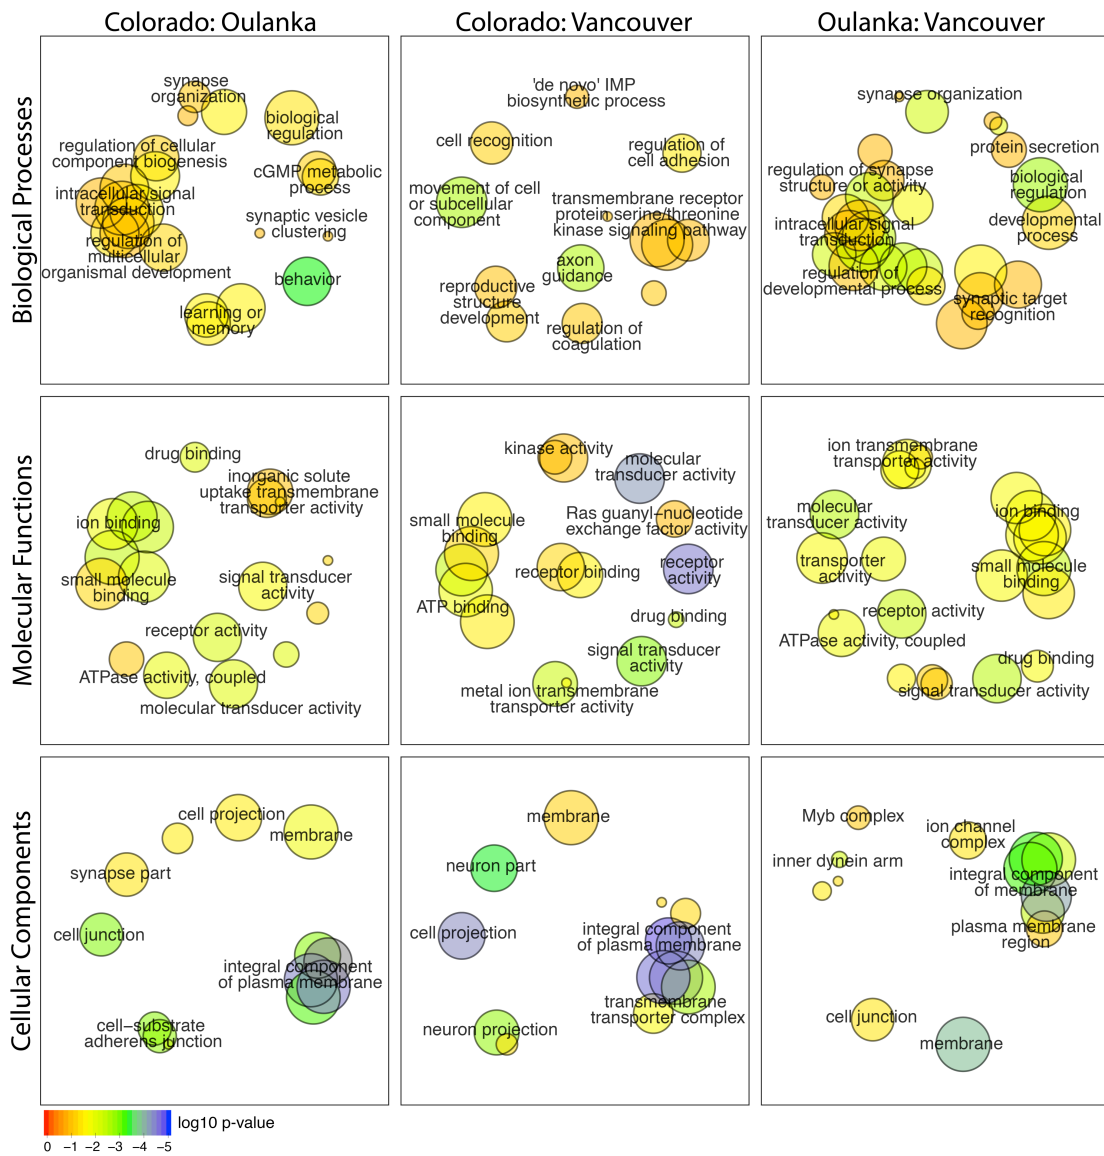

890

891 **Figure 8** | Semantic clustering of significantly (FDR < 0.1) enriched GO-terms for genes  
 892 showing significant divergence between populations of *D. montana*. Circle size corresponds  
 893 to the number of genes annotated to the term in the reference database. Circle colour  
 894 indicates  $\log_{10}$  FDR of the GO term

895
